# Supplementary material for: Construction and verification of risk prediction model of pulmonary embolism in ICU patients with COPD in acute exacerbation based on age, SAPSII score, braking state, and mechanical ventilation
Source: Front Med (Lausanne). 2025 Apr 8;12:1564220. doi: 10.3389/fmed.2025.1564220 (PMC12011782; doi:10.3389/fmed.2025.1564220)
Supplement: Supplementary file 2 [file Data_Sheet_1.xlsx]

## Sheet: PE阳性组
Age	Gender	SAPS II Score	Immobilization ≥7 Days	Invasive Mechanical Ventilation	D-dimer	ABCD Classification	Comorbidities	Anthonisen Classification (Grade I)	BMI	Smoking History	Platelet Count	Random Blood Glucose	CRP	White Blood Cell Count	Arterial Oxygen Pressure	Arterial Carbon Dioxide Pressure	Pleural Effusion	Atelectasis	Atrial Fibrillation	Systolic Blood Pressure	Oxygen Saturation
74	Male	62	√	√	2061.83	Class C	2	√	23.97	28	218.34	9.7	40.22	10.29	64.69	61.44				124	99.1
73	Male	65	√	√	1983.75	Class C	3	√	30.25	32	300.13	13.9	15.72	5.69	64.5	54.64				140	95.5
79	Female	65	√	√	2489.82	Class C	2	√	28.13	35	295.35	12	39.97	4.16	60.92	40.67	√			121	87.4
73	Male	54	√		2259.3	Class C	1	√	28.02	29	249.47	10.4	30.31	11.23	68.2	48.26				133	95.2
75	Female	50	√	√	2199.13	Class D	1		24.74	32	246.98	14	40.13	5.14	71.42	49.02	√			121	89.9
80	Male	48	√		2593.39	Class C	1	√	25.07	28	236.39	8.4	52.88	1.52	64.34	37.67	√	√		131	93.4
66	Female	75		√	1699.58	Class D	2	√	26.34	30	239.21	6.9	25.1	6.26	67.64	70.56				114	93
78	Male	54	√	√	2079.07	Class C	1		22.78	34	239.44	6.3	28.58	7.87	70.62	48.32	√			134	97.1
76	Female	24	√	√	1427.74	Class C	0	√	24.95	32	266.07	10.1	29.3	3.34	64.36	52.2				126	94.6
75	Female	51		√	1879.69	Class C	2	√	29.31	36	247.48	9.9	39.04	5.75	69.1	49.02	√			124	97.9
79	Male	41		√	2642.81	Class C	0	√	23.9	32	263.3	8.1	39.66	1.52	60.74	64.98				114	92
80	Male	44	√	√	2644.06	Class C	3		27.7	30	188.73	9.4	40.25	7.23	58.86	51.76			√	137	88.9
71	Male	38	√		2119.66	Class D	1		25.51	31	266.6	10.8	37.65	2.7	69.26	51.78	√			136	92
75	Male	38	√	√	2173.59	Class C	1		28.85	33	297.29	9.1	23.29	8.81	65.37	45.7				109	93.7
87	Female	49	√		2362.61	Class C	0		26.31	29	295.05	8.8	26.99	2.83	60.36	60.23				147	87
94	Male	68	√	√	2402.65	Class C	1		21.34	31	243.59	5	37.8	3.56	64.27	46.78				139	92.9
76	Male	55	√	√	2566.89	Class C	2	√	30.05	30	209.8	7.7	45.1	1.55	61.25	42.5				145	92.4
80	Male	61	√		2051.61	Class D	3	√	23.85	27	285.96	10.9	30	2.8	62.07	39.28				130	95.7
79	Female	47	√	√	2396.74	Class C	4	√	28.08	32	264.99	5.9	46.24	2	70.2	50.75		√		122	93.8
80	Male	45	√	√	1783.57	Class C	3		27.05	32	207.56	9.9	30.74	5.35	66.37	57.58				123	98.5
69	Male	45	√	√	2134.41	Class C	1	√	30.3	33	207.4	3.2	39.56	3.46	64.79	48.88	√			134	93
81	Female	65	√		1870.05	Class C	1	√	25.79	34	303.95	12.2	27.19	3.09	68.49	61.24		√		142	99.5
76	Male	57		√	2382.08	Class C	2		25.68	26	232.26	11	28.75	9.08	71.51	41.2				135	92
72	Female	47	√	√	2738.14	Class C	0	√	24.65	32	282.13	7.6	32.89	2.36	67.95	48.42				131	95.7
72	Female	63			2659.37	Class C	1	√	27.66	30	325.49	14.2	35.32	7.33	67.29	35.69				121	91.8
78	Female	58	√	√	1874.63	Class C	3	√	26.18	24	213.32	8	26.51	7.43	73.98	49.33		√	√	128	95.2
71	Male	72	√	√	3136.44	Class C	2		24.45	36	218.55	8.9	41.51	10.97	65.98	56.13				122	93.6
65	Female	65	√	√	2083.24	Class C	2	√	28.35	30	225.77	7.3	32.69	5.49	58.35	56.21				112	92.9
71	Female	30	√	√	2574.89	Class C	2		22.99	30	259.09	7.8	38.15	3.73	60.79	46.53				136	97.9
72	Male	64	√	√	2039.05	Class D	1	√	29.55	28	230.18	6.8	41.83	2.27	69.16	43.08	√			140	94.7
58	Female	54	√		2243.07	Class C	1	√	26.48	32	258.28	8.7	49.4	3.87	55.61	36.59			√	133	91.3
76	Male	49	√		2477.4	Class D	2	√	29.63	27	282.13	9	31.66	3.98	66.63	62.27		√		130	93.2
74	Male	46			1882.62	Class C	2	√	27.67	34	209.62	10.9	23.05	4.48	69	51.93				123	89
74	Male	51	√	√	2216.23	Class D	2	√	29.06	33	213.6	3.9	22.66	3.77	66.91	42.32		√		136	93.3
72	Male	58	√		2315.45	Class D	4	√	21.62	36	232.58	9.9	33.35	5.51	72.02	45	√			140	89.3
81	Male	56	√	√	2041.53	Class D	0	√	29.03	43	243.46	11	29.93	4.83	70.9	57.75				128	96.3
74	Male	55		√	2394.43	Class C	1		27.34	35	279.25	13.5	42.83	5.51	67.01	42.29		√		110	86
83	Female	57	√		2269.36	Class C	2	√	24.75	32	290.87	6.9	34.2	1.09	64.04	48.73				124	95
84	Male	39	√	√	2449.3	Class C	0		28.23	38	238.87	6	28.67	4.72	63.63	44.65	√			115	90.8
74	Male	37			2289.61	Class C	0	√	24.62	29	207.41	8.5	24.95	9.76	70.79	58.29				121	94.7
78	Female	49	√		2386.37	Class D	2		28.1	30	215.3	1.8	30.32	2.57	58.96	50.7	√			127	96.1
74	Female	55			1899.22	Class C	3	√	28.31	35	220.61	8	32.15	3.62	59.5	42.8				125	90.4
79	Male	48	√		2075.35	Class D	1		24.66	26	251.87	7.1	36.3	9.68	65.6	42.49	√	√		128	94.4
84	Female	53	√	√	1860.53	Class D	3	√	27.76	36	235.87	8.7	37.7	7.5	63.93	34.42				121	98.7
85	Male	36	√		2378.98	Class C	4		29.15	25	248	11.3	32.46	4.02	69.37	47.72				128	94.2
70	Female	56	√	√	2510.42	Class D	3	√	27.4	36	268.81	9.8	24.32	4.54	72.47	41.62	√			124	100.5
74	Male	55			2450.72	Class C	3	√	31.01	35	255.9	8.6	40.15	4.23	76.49	53.03	√		√	148	93.3
62	Female	76	√		1537.64	Class D	4		27.73	37	253.51	4.6	28.49	1.31	67.93	50.6	√			120	98.6
78	Male	48	√	√	2460.02	Class C	1		27.27	38	212.07	9.6	37.12	4.67	67.91	57.91				126	88.4
82	Male	57	√	√	2135.9	Class C	2	√	23.86	27	205.13	5.9	43.11	2.79	70.29	52.57				137	91.1

## Sheet: PE阴性组
Age	Gender	SAPS II Score	Immobilization ≥7 Days	Invasive Mechanical Ventilation	D-dimer	ABCD Classification	Comorbidities	Anthonisen Classification (Grade I)	BMI	Smoking History	Platelet Count	Random Blood Glucose	CRP	White Blood Cell Count	Arterial Oxygen Pressure	Arterial Carbon Dioxide Pressure	Pleural Effusion	Atelectasis	Atrial Fibrillation	Systolic Blood Pressure	Oxygen Saturation
62	female	40			2307.12	Class C	1		26.62	29	225.45	7.5	28.86	6.06	67.98	52.39				130	94.7
65	female	58	√	√	2304.32	Class C	0		19.26	32	283.67	7.6	21.95	7.87	63.11	51.58	√			126	96.3
72	female	34	√		2337.43	Class C	2		26.59	29	274.75	6.5	27.82	5.03	64.1	46.56	√		√	124	91.9
63	female	34			2246.64	Class C	1	√	26.4	33	216.78	6.7	19.09	13.08	78.72	51	√			128	99.1
75	female	29	√	√	2278.65	Class D	1		25.3	31	254	8.2	27.14	10.79	59.04	56.13				138	98.4
59	male	53		√	2291.72	Class C	2	√	29	24	275.32	8.2	38.01	11.24	73.43	37.51	√		√	144	92.1
70	male	55	√		2177.48	Class C	1	√	23.63	40	237.97	3.5	32.24	13.82	62.51	43.63				127	97.7
62	female	61			2096.93	Class D	2		23.76	34	227.8	8.9	30.45	6.47	72.9	70.05				113	95.7
61	male	45		√	2321.22	Class C	1	√	21.75	34	305.97	7.5	48.53	8.96	64.13	58.85			√	113	99.8
56	female	56	√		2450.53	Class C	3		26.03	32	286.72	9.2	31.04	7.14	66.5	43.66				138	96.6
60	male	44	√	√	2434.42	Class C	1	√	23.98	33	205.7	10.8	27.76	14.08	65.82	55.01				116	99.3
52	male	30	√		2242.12	Class D	1		28.45	26	219.01	6.9	51.02	5.57	60.09	40.48	√			124	88.5
66	male	41	√		2162.89	Class D	2	√	26.01	29	224.56	6.4	40.1	9.63	64.53	56.33				140	94.3
54	female	51			2067.49	Class D	1		29.7	27	231.09	4	36.63	4.91	66.37	45.63			√	124	99.1
67	male	34	√		2103.15	Class D	3		28.71	34	219.23	7.5	31.21	14.08	71.73	46.97	√		√	129	99.8
70	female	37		√	2317.73	Class C	1		28.38	38	242	9.6	19.16	13.86	68.03	34.33		√	√	113	97.7
64	female	55	√		2269.18	Class D	1		24.52	34	226.55	8.4	36.42	9.38	67.05	34.52				127	90.3
62	male	55			2213.21	Class C	1		26.96	21	261.41	6.4	32.43	11.9	64.76	59.53	√			115	95.9
67	male	50			2275.94	Class C	1	√	29.8	28	243.37	9	45.02	13.48	68.72	38.38				112	97.8
74	female	44			2388.62	Class D	2		27.96	33	258.45	9.5	35.41	15.46	72.32	49.24				114	101
65	male	52	√	√	2186.77	Class D	1	√	22.72	33	249.49	11.2	28.57	7.46	62.62	50.43				109	99.5
57	female	39			2106.52	Class D	1		26.27	34	162.96	8.4	29.22	18.71	67.1	58.28	√			121	95.1
54	male	59	√	√	2327.78	Class C	1		26.25	33	250.99	10.5	35.26	9.72	71.98	46.02				133	94.3
69	male	51	√		2084.61	Class D	2	√	20.09	30	302.22	6.6	14.46	7.94	68.2	59.11	√			135	96.2
57	female	52	√		2421.45	Class D	3		27.64	29	258.32	4.6	28.05	9.53	62.4	67.65				141	91.7
77	male	54			2176.28	Class D	1		25.17	28	243.76	7.7	34.5	9.18	71.18	38.46	√			118	101.4
73	male	42	√		2174.71	Class D	1		23.93	31	276.44	8.6	24.03	12.01	65.39	56.24	√			133	94.7
45	male	49			2087.79	Class C	0	√	27.39	29	233.34	9.5	28.95	9.59	76.12	54.85				132	94
60	female	63	√	√	2233.5	Class D	1		24	31	268.68	10.3	51.26	8.68	79.35	48.62	√			146	91.6
67	male	46			2107.94	Class C	1		20.89	25	256.05	10.8	36	5.27	63.52	49.83				119	93.4
66	male	60			2132.18	Class C	1	√	27.52	33	255.51	5.6	38.04	7.3	72.76	46.63				133	97.2
81	male	59		√	2136.43	Class D	0		21.26	25	189.79	6	29.34	9.19	66.97	50.96				136	99.1
66	female	44	√		2242.65	Class D	1		20.12	30	274.66	8.2	31.47	10.7	73.41	56.63				122	97.9
69	male	41		√	2279.81	Class C	3		26.87	30	274.62	6.7	33.03	9.33	74.23	51.62				120	97
55	male	41			2467.12	Class D	1		22.22	34	281.87	10.2	34.59	3.28	74.54	60.58		√		124	95.7
69	male	35		√	2104.78	Class C	2		26.79	31	225.63	9.8	26.87	9.11	68.06	57.34				141	93.8
64	male	59			2152.65	Class D	1		22.58	27	298.24	9.2	50.52	7.14	65.3	46.29	√	√		121	96.8
62	male	35	√		2269.74	Class C	0		20.97	35	248.42	9.8	42.46	10.21	73.14	55.17				115	95.1
67	male	29			2225.95	Class D	1	√	28.92	26	316.33	8.1	25.57	12.71	64.77	52.32			√	135	91.1
66	male	41	√		2271.76	Class D	2		25.49	34	266.53	8.2	50.29	6.36	70.59	38.23		√		101	94.5
65	female	32		√	2278.82	Class C	1		26.93	32	233.03	9.2	25.18	10.22	63.53	54.15				133	93.1
66	male	41			2129.32	Class D	2		30.1	23	294.42	6.9	32.46	8.9	73.34	53.06				117	94.3
65	male	50			2177.23	Class C	2		23.47	28	281.34	8.5	31.96	8.48	75.82	52.78	√			123	100.4
51	female	46	√		2344.87	Class C	1		29.4	26	315.22	8.5	32.28	10	60.16	43.7			√	123	93.2
63	female	55		√	2123.11	Class C	1	√	28.05	22	246.44	9	33.84	15.35	64.79	42.58				129	94
72	female	44	√		2182.43	Class D	1		28.35	27	237.85	5.1	48.56	5.79	62.52	52.66				129	97.9
64	male	44		√	2152.03	Class D	2		25.2	35	264.92	9.1	21.88	14.05	58.86	41.29	√		√	128	96.5
65	female	37			2083.24	Class C	2	√	27.73	39	165.37	10.9	24.97	4.46	72.2	56.77				135	98
69	male	55	√	√	2312.94	Class D	0		24.07	34	256.65	9.3	26.19	4.01	59.88	45.56	√			123	97.5
62	male	51			2362.63	Class C	0		27.25	35	272.23	5.8	18.13	8.37	77.03	55.71				106	91.2
72	male	48			1970.45	Class D	1		31.03	30	297.76	8.3	41.14	6.4	67.26	53.26	√			126	98
63	male	19			2218.31	Class D	1	√	23.91	34	299.76	7.6	44.38	11.38	72.91	42.55			√	122	94.4
65	male	52	√	√	2344.37	Class C	1		27.62	30	290.83	8.3	37.47	11.74	66.56	49.12				151	96.7
66	male	36		√	2140.57	Class C	1		24.1	23	253.6	7.5	35.41	11.95	61.56	60.06				136	95.9
64	female	48			2102.34	Class D	1		23.06	24	235.48	10.6	41.98	6.92	70.11	50.18		√		122	97.1
60	male	40		√	2155.6	Class C	1		31.65	29	260.09	7.4	22.31	7.98	66.11	56.78	√			136	96.5
65	male	40			2293.57	Class D	0		27.85	23	281.53	7.2	31.29	12.12	73.92	51.56				128	94.1
53	male	54	√		2163.15	Class C	0		32.32	35	253.11	9	63.09	13.06	68.67	67.16				116	98.1
54	male	51			2117.08	Class C	1		27.1	31	232.11	9.1	37.24	5.8	69.3	60.17	√			102	98.2
57	male	42			2146.47	Class C	0	√	34.38	35	260.89	8.2	40.08	14.37	65.39	60.92				147	90.9
58	female	44		√	2282.17	Class D	1		26.98	37	307.13	7	35.9	13.98	65.84	38.6	√			116	93.6
78	female	50	√		2149.72	Class C	1		27.3	24	274.16	5.6	36.63	10.4	69.9	48.71	√			116	94.7
55	female	35			2218.2	Class C	2	√	24.05	31	257.94	8.9	46.55	9.52	64.88	40.66	√			113	97.3
62	female	52	√	√	2197.38	Class D	1		21.78	29	249.12	11	32.51	16.57	66.09	47.96				124	98.3
61	male	55			2347.42	Class C	2		26.47	31	257.52	7.8	36.87	11.88	71.77	52.06				139	97.9
52	female	53		√	2121.55	Class D	2	√	29.01	32	213.32	10	33.1	6.53	65.81	45.97				90	89.3
60	male	44	√		2236.95	Class C	2	√	26.68	36	251.81	7.5	22.65	12.77	68.28	56.91	√			116	92.9
55	male	38			2195.94	Class D	3		28.51	34	229.63	7.2	25.96	13.15	72.78	48.79				123	96.4
75	male	46		√	2045.66	Class C	2		23.52	28	254.21	6.1	38.23	6.75	58.42	48.23				139	95.8
66	male	57			2187.62	Class D	3	√	22.52	29	261.23	6.9	46.61	14.16	71.1	33.35		√		142	95.6
61	male	34			2116.89	Class D	3		27.3	32	229.84	5.1	28.89	9.82	67.69	40.92				140	95.8
57	female	64	√		2129.97	Class C	0		25.59	25	276.04	6.9	59.65	12.78	67.07	45.18		√		117	93.1
63	male	31		√	2026.29	Class D	0		27.79	32	291.4	6.9	49.14	10.08	67.96	37.55				127	94.7
62	male	31			2211.51	Class C	1		21.57	29	288.19	8.4	37.14	14.43	67.85	55.17				113	95.9
69	male	35			2128.86	Class D	0		23.82	28	274.96	8.9	37.28	8.39	73.81	54.65				136	93
66	male	52	√		2200.14	Class C	1		27.64	25	223.63	5.7	23.53	11.96	63.51	44.82				125	94
77	female	52			2286.1	Class C	1		26.87	28	289.22	7.3	37.64	10.28	59.66	50.26		√		122	93.4
54	male	62		√	2141.77	Class D	2		28.48	29	242.37	7.8	39.34	12.32	62.44	39				122	98.1
69	male	45	√		2087.52	Class D	1		27.27	28	236.63	6.2	46.29	7.93	63.23	31.3				127	92.1
68	male	42	√	√	2306.82	Class D	1		25.77	39	263.48	7.9	37.97	14.81	62.04	48.19				134	92.3
71	male	36	√		2176.76	Class D	3		26.11	28	255.57	10.3	30.47	4.92	63.74	57.21	√			105	104
59	female	59	√		2312.01	Class C	2	√	29.99	30	286.87	9.7	31.09	8.79	70.39	38.92				125	94.9
76	male	36		√	2271.62	Class D	2	√	24.45	33	262.35	5.7	53.32	8.69	74.81	42.2	√			137	100.8
73	female	50	√		2204.57	Class D	1		27.6	30	297.31	6.6	47.09	10.74	74.59	49.9				140	97.2
77	male	53		√	2098.62	Class D	0		20.05	33	237.13	7.2	35.8	14.22	72.45	65.52				145	94
63	male	47			2100.64	Class D	0		26.15	25	226.65	10.5	56.7	8.7	70.98	45.67				119	94.5
62	female	65			2190.17	Class D	0		32.59	37	246	8.7	28.08	11.99	66.08	50.07				126	94.2
53	male	54		√	2425.32	Class D	1		27.67	35	264.25	6.2	41.57	7.52	79.18	49.28	√	√		132	90.5
55	female	48			2170.87	Class D	0		24.66	38	306.29	5.1	43	11.59	67.71	48.02				145	89.7
63	female	56			2184.68	Class C	2		27.52	28	294.34	9.2	40.99	9.69	74.64	43.3				117	91.7
66	male	38			2038.18	Class D	1		26.28	34	186.44	8.2	40.16	10.63	74.48	58.43	√			135	90.9
55	female	39	√		2266.98	Class D	1	√	28.82	32	252.06	8.9	30.53	9.56	61.07	42.32	√			135	92.6
76	male	49		√	2144.77	Class D	1		26.8	30	231.09	6	27.31	12.16	74	41.71	√			121	93
65	male	55			2317.76	Class D	2	√	25.76	34	230.89	8	39.24	5.84	67.33	48.56				116	95.2
65	male	36			2235.36	Class C	0		25.33	34	234.8	7.4	22.79	11.65	72.98	35.57	√			116	96.5
66	female	21			2261.9	Class D	2		30.23	35	290.11	7.6	31.89	8.36	62.78	50.89	√			137	88.3
58	male	43		√	2123.97	Class D	0	√	25.85	26	218.55	6.5	10.92	11.26	69.88	51.41				104	97.9
59	male	55	√		2103.21	Class C	0		25.4	27	275.88	8.2	32.65	9.7	57.8	57.62				122	95.1
65	male	60		√	2258	Class D	1		23.8	29	189.69	8.9	34.55	13.04	74.19	54.87	√			109	97.2
58	male	53			2344.04	Class D	2	√	27.35	35	246.93	7.6	37.9	5.74	68.79	41.98				110	94.8
60	female	26			2114.98	Class C	1		25.77	30	237.65	4.8	37.89	6.29	68.92	46.6				106	92.3
65	male	49		√	2083.7	Class D	2		29.56	34	230.54	3.2	37.13	9.33	65.35	41.89				126	97.5
71	male	57			2051.12	Class D	2	√	25.47	33	286.21	8.2	25.42	11.17	63	38.16				119	95.1
61	male	49		√	2219.83	Class D	1		24.52	34	269.64	8.7	41.62	11.7	74.11	54.4				122	90.4
48	male	67			2109.16	Class D	3		28.01	32	270.07	6.2	30.74	12.07	74.64	40.31		√		107	96.6
53	male	39			2199.86	Class D	1		24.31	33	313.93	7.2	28.94	5.88	68.64	50.75				138	101.5
68	female	49	√	√	2186.15	Class C	1		30.87	33	293.44	6.2	39.53	9.96	71.11	62.24				128	97.2
60	male	37	√		2237.22	Class D	0		23.35	37	289.28	7.4	26.41	15.68	67.89	50.91				122	92
61	male	38			2209.5	Class D	0		24.31	29	272.15	8.3	32.48	12.25	64.53	49.52				123	96.2
57	male	42	√		2401.19	Class C	1		26.72	39	235.94	9.1	44.2	7.88	66.22	52.76	√			136	93.5
73	female	33	√		2312.81	Class C	2	√	26.52	36	173.7	7	31.63	13.05	64.9	54.09				130	91.6
68	female	45		√	2285.96	Class D	0		29.32	35	235.79	9.6	30.46	5.2	61.51	62.3				134	98.6
50	male	35			2135.61	Class D	2	√	30.9	30	311.11	7.8	23.18	15.3	64.04	42.78	√			124	97
69	female	52	√	√	2251.54	Class C	2	√	25.14	29	232.05	7.6	36.34	10.18	71.64	50.11				115	93.9
59	male	69		√	2212.06	Class D	2		25.55	27	257.89	7	38.38	5.54	62.5	32.28	√			128	92.9
78	male	50			2323.13	Class D	2	√	25.5	29	250.48	6.2	38.56	11.12	73.04	45.12				111	97.5
66	female	52			2236.72	Class D	2		28.1	24	236.9	5.9	28.78	9.35	68.31	57.55				119	94.8
45	male	42		√	2306.04	Class C	1	√	26.38	26	264.38	5.5	23.17	9.94	70.55	54.63				120	96.7
51	male	47			2100.64	Class C	1		25.34	31	272.82	7.1	33.7	9.36	71.72	30.96				112	98.1
64	male	46			2202.22	Class D	2		31.22	34	272.69	7.4	32.93	12.25	80.53	46.63				115	91.1
53	male	34			2065.86	Class D	1		27.37	40	281.05	8.2	38.98	8.42	70.04	52.25				128	96.9
56	male	38		√	2125.35	Class C	0		26	36	217.17	6.6	45.85	13.1	59.58	52.96				112	93.7
60	male	48			2096.09	Class D	3		24.98	28	214.72	8.1	47.13	8.17	72.42	52.61				143	91.7
57	male	24	√		2207.38	Class C	3		25.23	36	333.76	9.9	28.91	12.6	53.83	49.13		√		124	91.9
65	male	34			2248.82	Class D	0		21.94	28	254.08	10.3	20.61	8.7	54.7	47.38				137	91.4
61	male	46	√	√	2188.21	Class D	1		20.39	34	237.21	6.9	20.21	10.22	60.25	43.96				124	100.6
62	female	48			2124.8	Class C	2		22.52	33	216.24	11.9	27.09	9.53	65.8	46.43	√	√		123	93.6
58	male	45			2264.3	Class D	4		21.54	33	266.74	9.4	20.85	15.45	68.3	42.63	√			136	94.2
69	male	43	√	√	2097.77	Class D	2		23.06	28	268.4	6.5	20.83	12.32	72.26	35.93	√	√		125	94.7
53	male	45			2273.22	Class D	1		24.83	38	254.84	8.8	9.55	10.44	68.4	50.83	√			112	93.9
57	female	52		√	2213.06	Class C	2		28.32	35	232.03	9.5	27.03	13.78	72.71	23.53				118	98.8
60	male	50			2313.11	Class C	1		28.65	28	210.27	7.7	34.67	15.16	69.53	44.64				117	96.5
68	male	41			2386.08	Class D	0	√	29.23	31	306.21	4.6	28.3	10.66	70.49	52.21				122	98.7
61	female	48			2310.46	Class D	1		27.18	31	242.31	10.3	49.96	10.98	74.1	55.28				122	101.5
66	female	47			2080.39	Class C	1		30.29	24	209.16	9.6	45.4	13.95	67.23	37.21				139	93.8
61	male	41		√	2228.01	Class D	2		24.51	28	279.08	9	43.08	8.95	64.56	47.08	√			117	94.5
55	female	50	√		2185.71	Class D	1	√	26.64	31	256.81	9.3	24.8	9.34	66.28	57.91				137	96.8
63	male	48			2124.83	Class D	1		27.57	30	225.92	9.2	31.79	9.26	64.2	51.49				120	92.7
64	female	42			2230.98	Class C	1	√	21.72	33	266.12	7.3	31.16	9.96	67.87	49.52				127	91.4
59	female	54			2221.07	Class D	2		23.2	27	229.65	8.5	31.14	8.16	63.63	39.72		√		134	93
55	male	55	√		2120.51	Class D	3		24.84	34	262.78	6.6	40.86	6.8	64.37	44.89	√			136	100.6
69	male	23	√		2269.86	Class D	1	√	21.92	27	209.54	8.4	40.76	6.88	73.4	69.28	√			144	95.7
52	female	50	√		2294.64	Class D	1	√	27.96	23	265.13	6.2	37.35	10.08	63.2	47.45				132	93.3
57	male	16			2201.6	Class D	2		30.15	19	243.93	8.7	28.63	9.97	62.75	40.9				122	97.3
66	male	42	√		2388.44	Class D	0		25.04	32	257.64	11	22.92	12.41	62.03	52.92				128	93.9
68	female	42	√		2168.91	Class D	0	√	26.16	34	235.88	9.2	33.84	14.12	67.05	61.37	√			117	95.9
62	male	43		√	2146.86	Class D	1		28.74	29	286.11	7.1	29.26	9.55	68.75	56.02				123	94.7
66	female	22		√	2176.43	Class D	0		30.94	34	233.51	7.6	23.91	14.35	69.04	47.8		√		134	96.8
71	female	43			2341.26	Class C	3		23.42	39	268.48	6.9	38.51	13.78	64.85	50.14				133	94.9
55	female	32		√	2184.39	Class C	1		21.16	33	262.9	8.2	37.43	8.19	62.59	58.48		√		118	90.2
60	male	50	√		2259.3	Class D	2	√	25.72	39	224.56	7.8	25.65	11.93	77.49	47.04				131	89.9
63	female	52		√	2034.1	Class C	0		25.31	26	238.18	7.6	35.1	12.07	78.97	51.37				136	94
58	male	53			2292.41	Class C	1	√	26.05	40	180.9	9.9	28.26	6.08	69.96	31.78				112	95.4
58	male	34			2228.83	Class D	2	√	22.44	28	242.76	9.1	39.24	12.71	71.31	50.59				106	99.9
62	female	51		√	2286.58	Class D	3	√	25.56	23	196.78	6.4	38.51	8.5	69.19	54.29				148	93.4
59	female	47	√		2200	Class C	0		21.48	31	274.87	8.6	44.7	10.7	65.51	58.41				119	97.2
75	male	49	√	√	2316.72	Class D	2	√	25.86	33	238.2	9.9	33.88	11.76	68.37	44.93	√			105	95.3
56	male	52			2131.14	Class D	0		23.55	31	187.39	9.5	24.37	7.86	69.25	46.05				125	96.3
50	female	49	√		2175.84	Class D	1	√	24.38	30	326.45	7.8	41.64	6.59	64.42	63.63				125	96.8
76	female	47	√		2237.15	Class D	1	√	27.76	30	340.51	6.6	13.65	12.6	68.59	52.85				120	91.6
54	female	48	√	√	2213.76	Class C	0	√	29.45	30	285.3	6.8	24.41	11.94	67.15	53.25				134	94.8
72	female	32			2087.02	Class D	1	√	25.81	32	258.82	7.8	58.33	7.23	69.81	53.99	√			152	98.8
71	female	42	√		2253.11	Class C	1	√	26.63	31	274.04	9.5	26.6	12.6	63.84	55.09				123	99
54	male	51		√	2181	Class D	1	√	24.1	31	285.29	7.1	45.19	14.11	66.16	50.5				113	97.4
50	male	50	√		2240.78	Class C	4		24.51	32	271.42	6.9	34.17	9.42	80.57	51.36				115	93.1
65	female	43			2158.39	Class C	2	√	24.42	34	232.6	7.7	34.15	10.48	58.49	42.91				108	94.6
67	female	51	√		2369.16	Class D	1		25.42	32	228.53	9.7	46.23	7.23	73.85	45.95	√			132	95.1
62	female	50	√	√	2106.83	Class D	1		24.52	32	290.41	8.1	32.46	7.92	63.99	49.44				120	95.5
65	female	37		√	2153.74	Class C	2		24.04	30	287.1	8.7	38.89	8.53	67.52	40.35				131	96.7
66	male	39			2201.11	Class D	1		28.4	36	255.82	5.7	35.43	14.17	69.3	44.49				119	98.3
